# Supplementary material
Source: PubMed Central journal article supplement (PMC4156700)

# Supporting Information

Khmaladze et al. 10.1073/pnas.1405798111

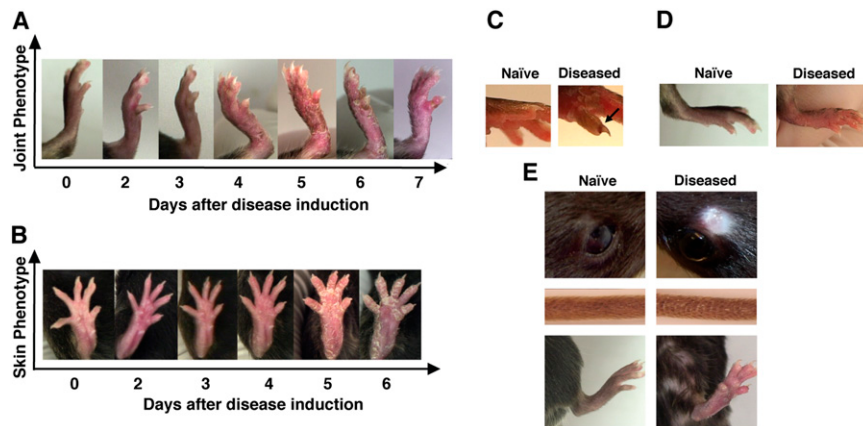

**Fig. S1.** Clinical phenotypes of mannan-induced psoriasis arthritis-like disease in mice. The arthritic joint phenotype (A) and psoriasis-like skin lesions (B) in B10Q.*Ncf1*<sup>m1j/m1j</sup> mice are shown. Onycholysis (C) and alopecia (D) developed during the late phase of the disease. (E) Representative images of pruritus above the eye (day 17), flaky skin on the tail (day 10), and alopecia on the hind leg (day 19) after the second mannan injection compared with naive mice.

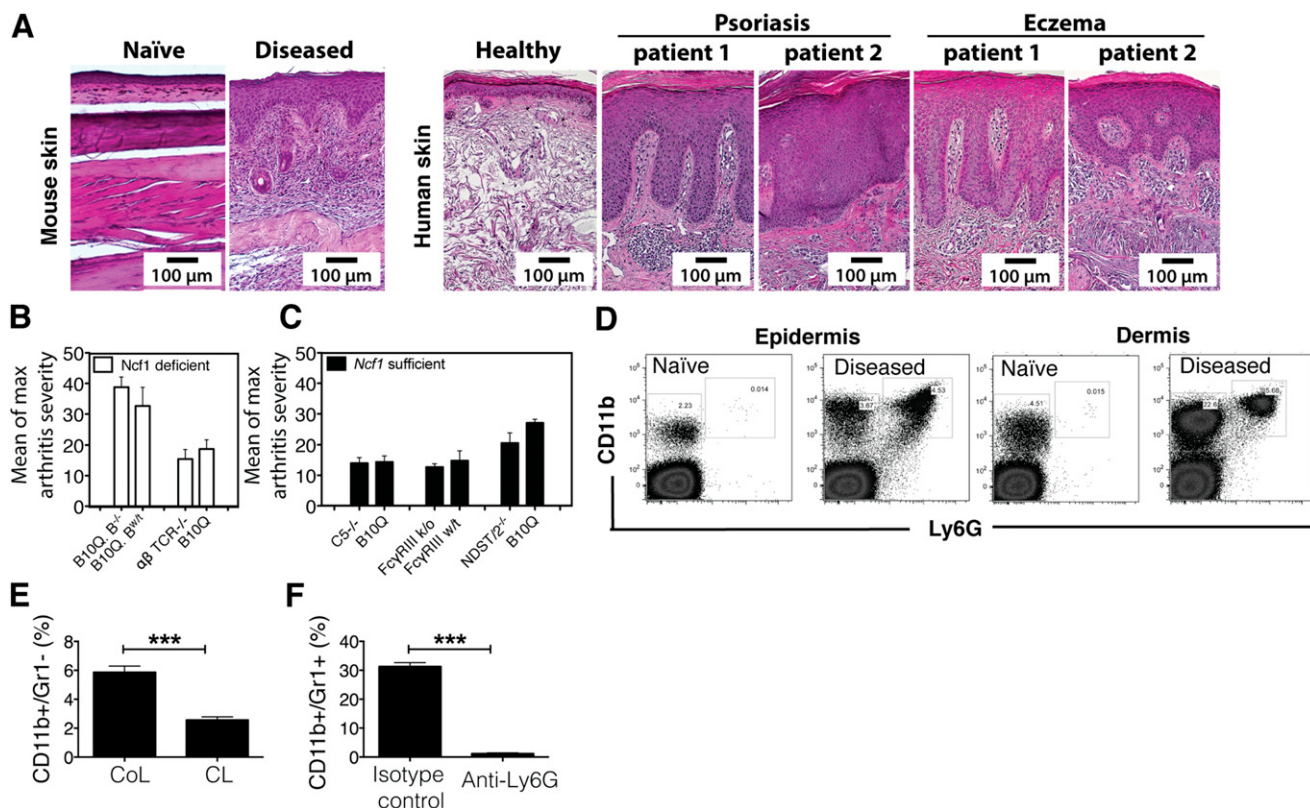

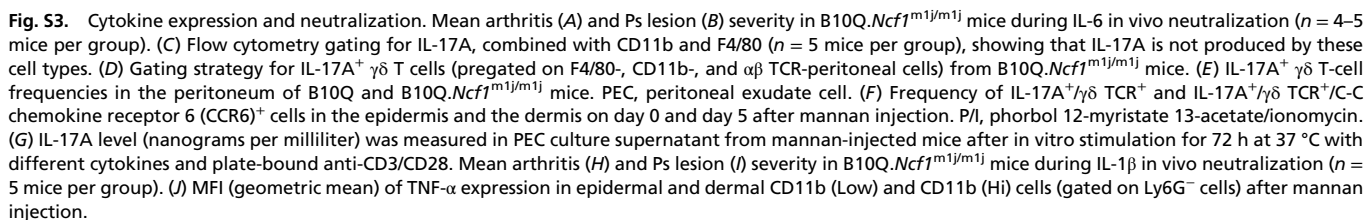

Supplement: 1405798111_pnas.201405798SI.pdf [file 1405798111_pnas.201405798SI.pdf]
